# Supplementary material
Source: PubMed Central journal article supplement (PMC3118405)

# Supplemental Figure 1

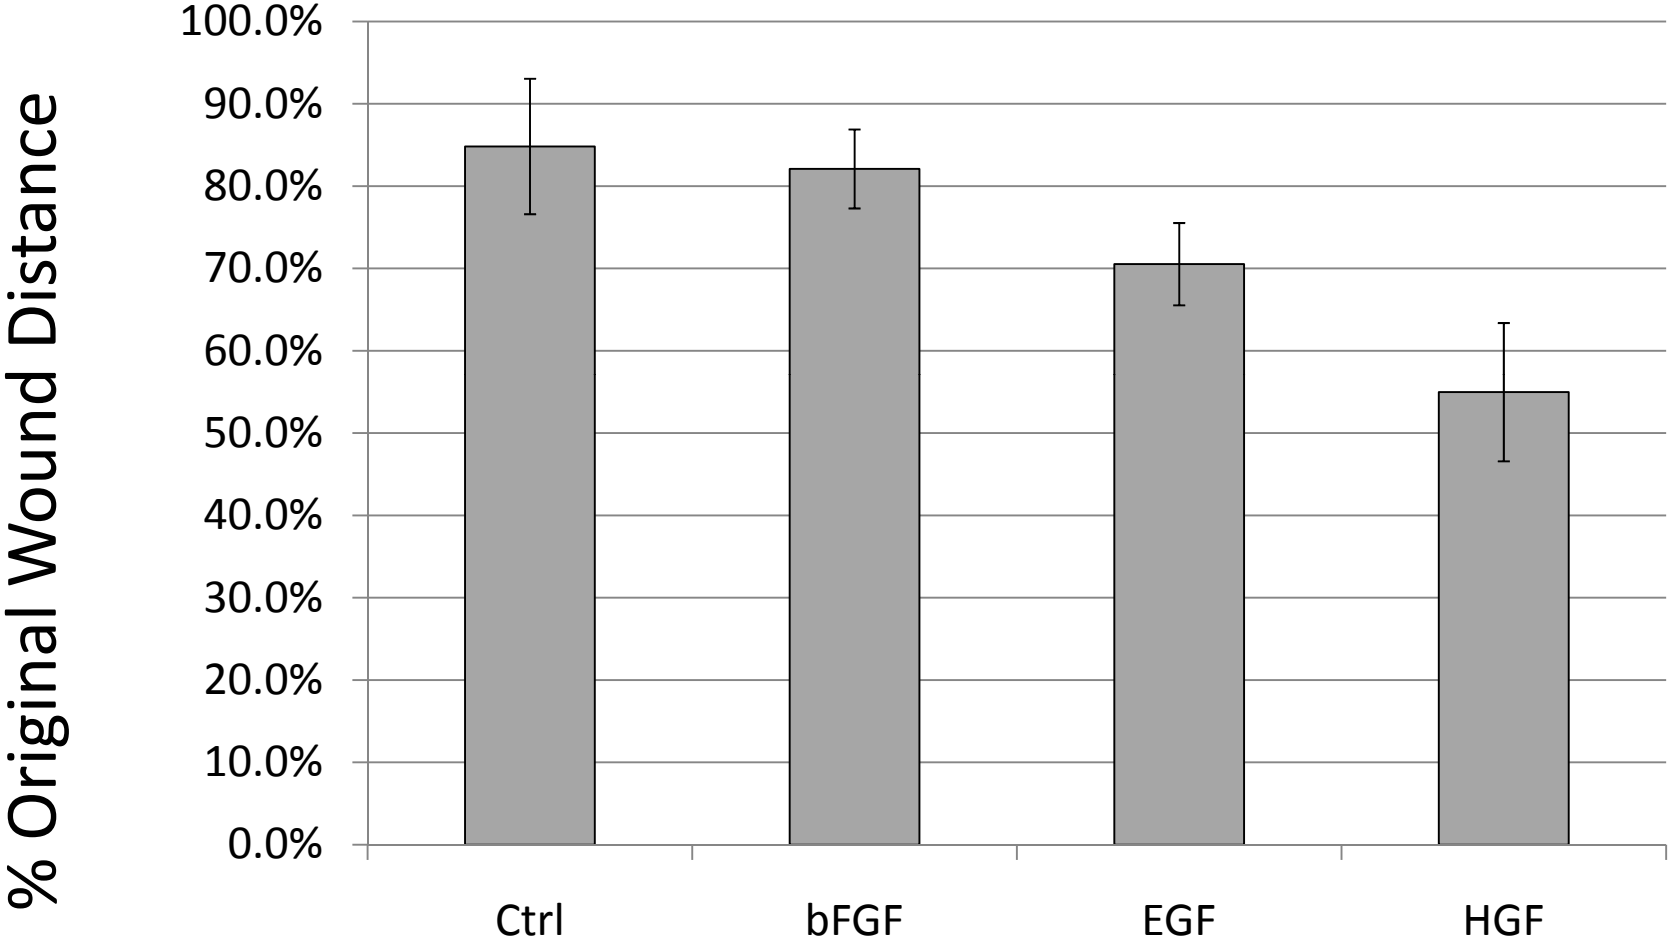

Supplement: NIHMS277860-supplement-5.pdf [file NIHMS277860-supplement-5.pdf]

# Supplemental Figure 3

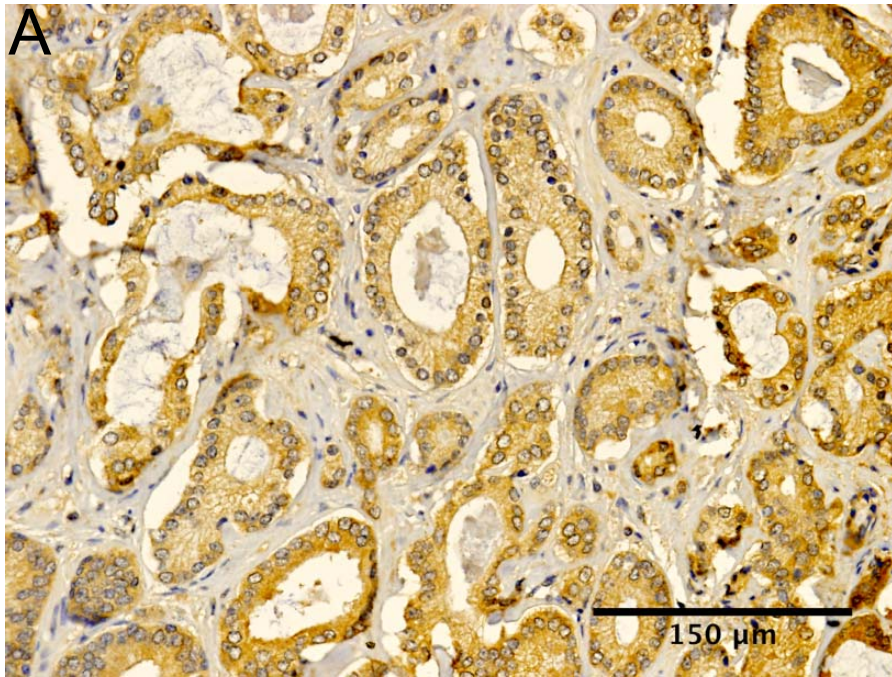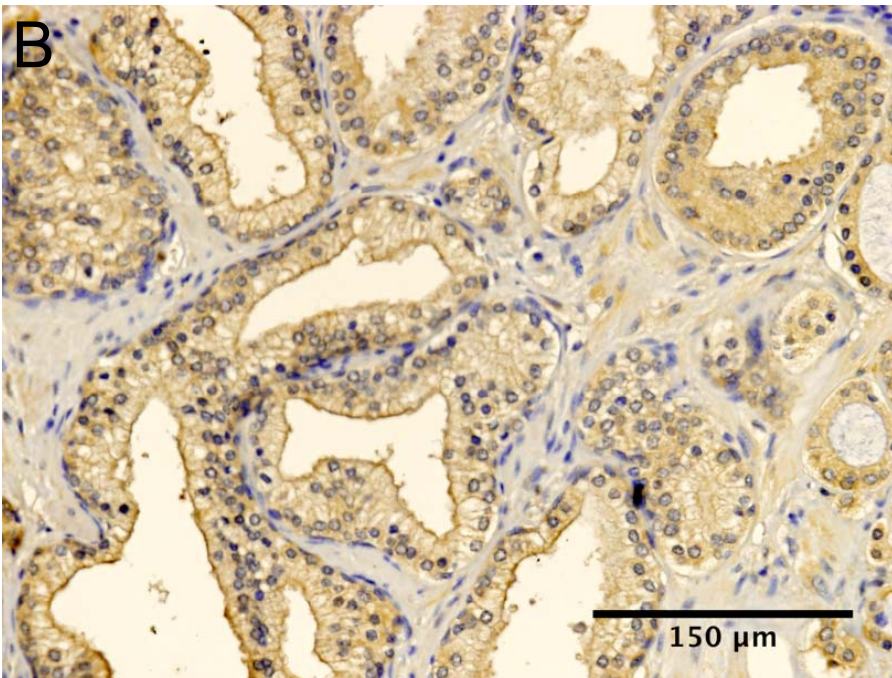

**C**

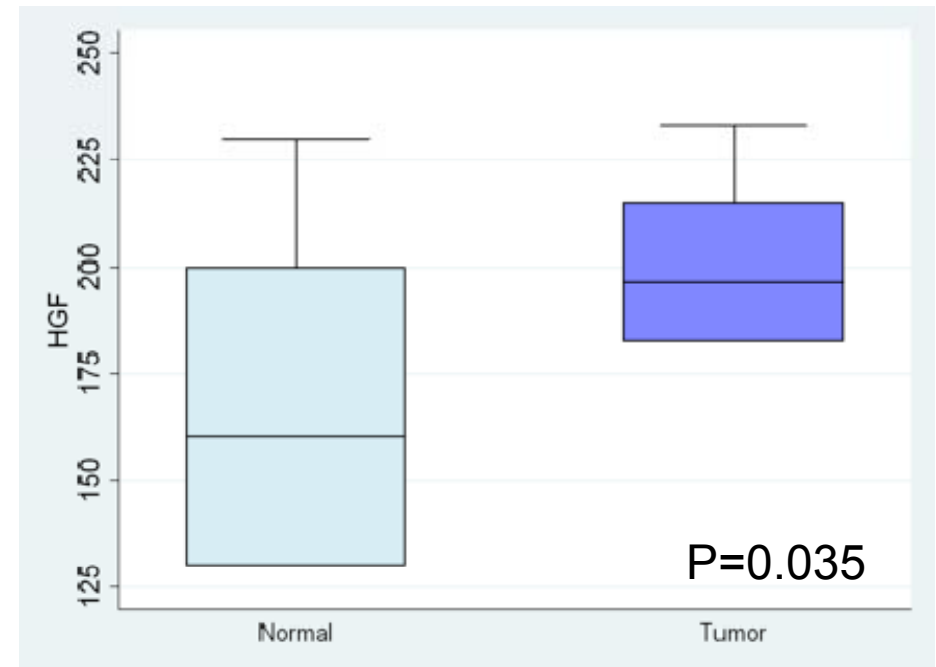

Supplement: NIHMS277860-supplement-7.pdf [file NIHMS277860-supplement-7.pdf]
